# Supplementary material for: Non-randomised feasibility study of training workshops for Talking Therapies service high-intensity therapists to optimise depression and anxiety outcomes for individuals with co-morbid personality difficulties: a study protocol
Source: PubMed Central journal article supplement (PMC10552316; doi:10.1186/s40814-023-01394-z), 2023-10-05
Supplement: 40814_2023_1394_MOESM1_ESM.pdf [file 40814_2023_1394_MOESM1_ESM.pdf]

# Problem Model

## Capability

- Lack of knowledge and understanding of personality difficulties and disorder
- Lack of knowledge and understanding of impact on personality difficulties/disorder on depression and anxiety
- Lack of knowledge and skills to normalise experiences of personality difficulties/disorder
- Lack of knowledge and skills in assessing for personality difficulties and disorder
- Lack of knowledge and skills in differentiating between those suitable for treatment within IAPT, and those to be referred/signposted on.
- Lack of knowledge and skills to discuss personality difficulties/disorder
- Lack of knowledge and skills around building client positive relationship to help
- Lack of knowledge and skills in managing challenging therapeutic alliance
- Lack of knowledge and skills in managing end of therapy
- Lack of knowledge and skills in supporting client to be environmental change agents around relationships, work and other parts of NHS system
- Lack of knowledge/skills in building client emotion regulations skills
- Lack of knowledge/skills in formulating co-occurring personality difficulties/disorder
- Lack of knowledge/skills in adapting usual practice to cope with cooccurring personality difficulties/disorder
- Lack of knowledge/skills in building client interpersonal effectiveness
- lack of knowledge and skills in boundary setting during therapy
- Lack of knowledge and skills in managing ruptures during therapy
- Lack of knowledge and skills in managing crises during therapy
- Lack of skills to maximise use of supervision
- Lack of self-care skills

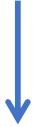

## Motivation

- Low perceived self efficacy to support clients with co-occurring personality difficulties/disorder
- Low self-efficacy in managing ruptures and crises during therapy
- Perceived negative consequences for brief treatments for clients with personality difficulties
- Belief that co-occurring personality difficulty is outside IAPT remit
- Negative beliefs about clients capacity to engage with therapy
- Negative beliefs about clients capacity to benefit from IAPT treatments
- Perfectionist personal standards regarding therapy delivery
- reluctance to become learner again for experienced therapists
- Negative beliefs about individuals with personality difficulties
- Belief that working with clients with personality difficulties is challenging and not enjoyable
- Some degree of 'burnout' due to ongoing workload pressures and change initiatives

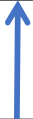

## Opportunity

- Lack of clear guidance around suitability for IAPT
- Lack of supportive structure to enable effective crisis management
- Insufficient time to attend training, due to absence of CPD time
- Insufficient time and headspace to reflect on practice during therapy due to high caseload and with back-to-back sessions
- Insufficient time to read materials whilst applying therapy, due to lack of CPD time
- Insufficient regular access to high quality supervision
- lack of peer group to discuss therapeutic work with
- Conflicting/confusing service guidelines/politics around label 'personality disorders'
- Service perceives personality difficulties/disorders as "not IAPT business"
- Working culture holds negative beliefs about individuals with personality difficulties

## Therapist Behaviours

### Style:

- Over focus on the difficult
- Fails to validate client emotional experience and distress
- Fails to empathise with client experience and distress
- Unable to build and sustain therapeutic alliance (particularly with challenging clients)
- Therapist does not share responsibility for change with client (taking on too much or little responsibility)
- Inconsistent in approach to therapy sessions
- Therapy follows a formal, serious style and is not fun
- Therapy is too protocol driven and formulaic (and not personalised to client needs)
- Over focus on risk management
- Failing to maintain appropriate therapy boundaries (timing, attendance etc)
- Therapy is over-complicated in response to client presenting complex problems
- Fails to recognise and consider personality difficulties within formulation and treatment
- Fails to anticipate working alliance challenges and ruptures
- Therapist fails to attend to own emotional reaction during therapy

### Structure:

- Fails to adequately socialise client to CBT structure early on in treatment
- Fails to co-set and follow a realistic agenda
- Fails to make appropriate use of psychoeducation
- Does not encourage client consolidation of learning
- Fails to manage time appropriately in sessions
- Does not monitor outcomes and use this in a way to refine therapy
- Does not seek and act on feedback from client, including around goals, tasks and process
- Fails to have a clear set of objectives for therapy to work towards; is not following a consistent blueprint for change
- Fails to manage boundaries around therapy (missed sessions, late appointments etc.), prematurely ends therapy
- Fails to adapt structure according to client moodstate

### Specific processes

- Does not help client build key skills in emotional regulation and interpersonal effectiveness
- Does not address client relationship to help or foster positive relationship to help
- Does not adequately target interventions that build client self-efficacy
- Does not help client deal adaptively with aversive emotions
- Does not focus on building behavioural competence and assertiveness skills
- Does not foster trusting relationship, support and safety and help clients evaluate threat
- Does not engage with positive aspects of client and areas of life going well

## Therapist Learning Style

### In session:

- Does not experiment with novel techniques/approaches in session
- Wishes to rigidly follow protocol or alternative to go off piste
- Does not monitor outcomes and use this in a way to refine own practice
- Does not prepare fully for sessions
- Therapist does not listen to own tapes or complete fidelity ratings scales

### Supervision and study:

- Does not regularly attend supervision
- Does not prepare fully for supervision
- Therapist is not fully engaged in supervision, including willingness to engage in role play, discuss process, and to experiment with novel techniques/approaches in supervision
- Therapist engages in a problem saturated rather than solution focused dialogue in supervision
- Therapist does not seek client, peer or supervisor feedback
- Therapist is defensive in face of feedback
- Therapist does not reflect on and refine practice, including committing to behavioural experiments in session and in own life based on supervision feedback
- Therapist does not provide constructive feedback to peers
- Therapist does not consolidate own learning (e.g. note-taking, diary keeping)
- Therapist does not appropriately liaise with other parts of the health system

### Broader Life:

- Therapist does not engage in self-care

## Clinical Outcomes

- Client is not fully engaged in treatment
- Treatment less effective
- Key aspects of clients lives are not worked on
- Higher subsequent levels of relapse
- Therapist does not enjoy therapy or feel they are doing a good job
- Client does not develop adaptive relationship to help
- Client does not enjoy therapy or feel liked by therapist

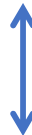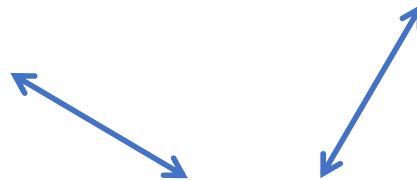

## Capability

- Have knowledge and understanding of personality difficulties and disorder
- Have knowledge and understanding of impact on personality difficulties/disorder on depression and anxiety
- Have knowledge and skills to normalise experiences of personality difficulties/disorder
- Have knowledge and skills to assess for personality difficulties and disorders
- Have knowledge and skills in differentiating between those suitable for treatment within IAPT, and those to be referred/signposted on
- Have knowledge and skills to discuss personality difficulties/disorder with clients
- Have knowledge and skills around building client positive relationship to help
- Have knowledge and skills in managing challenging therapeutic alliance
- Have knowledge and skills in managing crises during therapy
- Have knowledge and skills in supporting client to be environmental change agents around relationships, work and other parts of NHS system.
- Have knowledge and skills in building client emotion regulation skills
- Have knowledge and skills in formulating co-occurring personality difficulties/disorder
- Have knowledge and skills in building client interpersonal effectiveness
- Have knowledge and skills in boundary setting during therapy
- Have knowledge and skills in managing ruptures during therapy
- Have knowledge and skills in managing crises during therapy
- Have developed skills to maximise use of effective supervision
- Have developed self care skills

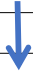

## Motivation

- High perceived self efficacy to support clients with co-occurring personality difficulties/disorder
- High perceived self-efficacy in managing ruptures and crises during therapy
- Perceived positive consequences for brief treatments for clients with personality difficulties
- Belief that co-occurring personality difficulty is within IAPT remit
- Realistic but positive beliefs about clients capacity to engage with therapy
- Realistic but positive beliefs about clients capacity to benefit from IAPT treatments
- Realistic, 'good enough' personal standards regarding therapy delivery
- Willingness to become learner again for experienced therapists
- Realistic but positive beliefs about individuals with personality difficulties
- Belief that working with clients with personality difficulties is within own capabilities and enjoyable
- Manageable workload pressures and change initiatives, meaning therapist is engaged

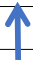

## Opportunity

- Sufficient clear guidance around suitability for IAPT
- Sufficient supportive service structure to enable effective crisis management
- Sufficient time to attend training, due to absence of CPD time
- Sufficient time and headspace to reflect on practice during therapy, due to manageable caseload with breaks between sessions
- Sufficient time to read materials whilst applying therapy, including allocated CPD time
- Sufficient regular access to high quality supervision
- lack of peer group to discuss therapeutic work with
- Consistent clear messaging from service leads around label 'personality disorders' and subthreshold personality difficulties
- Service is inclusive for clients with depression or anxiety and co-occurring personality difficulties and disorders and takes on clients suitable for primary care based treatments and believes they are "IAPT's business"
- Working culture holds realistic but positive beliefs about individuals with personality difficulties

## Therapist Behaviours

### Style:

- Balanced focus on the difficult and positive aspects of client and areas going well
- Appropriately validates client emotional experience and distress
- Appropriately empathises with client experience and distress
- Able to build and sustain therapeutic alliance (particularly with challenging clients)
- Therapist shares responsibility for change with client
- Therapist employs a consistent approach to therapy sessions
- Therapy follows a fun, creative, playful but validating style
- Therapy follows protocol and principal, but is delivered flexibly to weave into client agenda.
- Therapist responds with simple clear interventions in the face of complexity
- Therapist recognises and considers personality difficulties within formulation and treatment
- Therapist anticipates working alliance challenges and ruptures
- Therapist attends to own emotional reaction during therapy

### Structure:

- Therapist socialises client to CBT structure early on in treatment
- co-sets and follows a realistic agenda
- makes appropriate use of psychoeducation

- sets and reviews appropriate homework
- encourages client consolidation of learning
- manages time appropriately in sessions
- monitors outcomes and uses this to refine therapy
- seeks and act on feedback from client, including around goals, tasks and process
- has a clear set of objectives for therapy to work towards; is not following a consistent blueprint for change
- Manages boundaries around therapy (missed sessions, late appointments, etc.) and is quick to set boundaries, but cautious to end therapy.
- Adapts structure according to client mood state

### Training-Specific processes

- Helps client build key skills in emotional regulation and interpersonal effectiveness
- Addresses client relationship to help and fosters positive relationship to help
- Targets interventions that build client self-efficacy
- Helps client deal adaptively with aversive emotions
- Focuses on building behavioural competence and assertiveness skills
- Fosters trusting relationship, support and safety to help clients evaluate threat
- Engages with positive aspects of client and areas of life going well

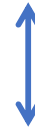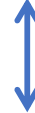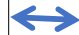

## Therapist Learning Style

### In session:

- Willing to experiment with novel techniques/approaches in session
- Follows protocol but in a flexible, principal driven way
- Monitors outcomes and use this in a way to refine own practice
- Prepares fully but efficiently for sessions
- Therapist listens to own tapes and completes fidelity ratings scales

### Supervision and study:

- Regularly attend supervision
- Prepares fully for supervision
- Therapist is fully engaged in supervision, including willingness to engage in role play, discuss process, and to experiment with novel techniques/approaches in supervision
- Therapist seeks client, peer and supervisor feedback
- Therapist is reflective and responsive in face of feedback
- Therapist reflects on and refines practice, including committing to behavioural experiments in session and in own life based on supervision feedback
- Therapist provides constructive feedback to peers
- Therapist consolidates own learning (e.g. note-taking, diary keeping)
- Therapist appropriately liaises with other parts of the health system

### Broader Life:

- Therapist engages in good enough in self-care at home and at work

## Clinical Outcomes

- Client is fully engaged in treatment
- Treatment effective at building wellbeing and reducing depression
- Key aspects of clients lives are worked on
- Reduced subsequent levels of relapse
- Therapist enjoys therapy and feels they are doing a good job
- Client develops adaptive relationship to help
- Client enjoys therapy and feels liked by therapist
